# Supplementary material for: Regulatory factor identification for nodal genes in zebrafish by causal inference
Source: Front Cell Dev Biol. 2022 Oct 20;10:1047363. doi: 10.3389/fcell.2022.1047363 (PMC9630340; doi:10.3389/fcell.2022.1047363)
Supplement: Supplementary file 2 [file Table7.xlsx]

## Sheet: WT
ndr1(Dig 549)													ndr2(Flu 488)
		Area	Mean	Min	Max	IntDen	RawIntDen		Total Intensity						Area	Mean	Min	Max	IntDen	RawIntDen		Total Intensity
3.7h WT+DMSO	ROI												3.7h WT+DMSO	ROI
e2	Margin	203268	0.078	0.021	0.438	15842.7	43379123		6289.06				e2	Margin	203268	0.055	0.01	0.827	11156.3	45774529		2619
	background	6216	0.057	0.047	0.103	354.846	1389999							background	9678	0.042	0.028	0.137	402.517	2242887
e5	Margin	74556	0.039	0.003	0.194	2918.13	17381296		9979.67				e5	Margin	74556	0.064	0.009	0.438	4770.34	16436625		2384.55
	background	2447	0.034	0.026	0.054	82.207	577558							background	2226	0.053	0.032	0.099	118.119	502419
e7	Margin	238393	0.08	0.016	0.561	19056.7	50646751		10713				e7	Margin	238393	0.084	0.017	2.106	19918.8	50343613		7522.39
	background	8188	0.061	0.035	0.126	498.727	1814961							background	4334	0.052	0.041	0.151	224.918	980838
e8	Margin	241131	0.113	0.023	0.482	27277.5	47516153		10639.5				e8	Margin	241131	0.053	0.01	0.52	12848.8	54430609		3685.86
	background	6582	0.069	0.043	0.142	456.254	1431201							background	8135	0.038	0.016	0.062	311.366	1899680
e9	Margin	143146	0.174	0.014	0.549	24907.5	24907975		7443.66				e9	Margin	143146	0.065	0.01	0.526	9313.77	31476540		3731.08
	background	3382	0.122	0.056	0.202	413.68	651919							background	5708	0.06	0.039	0.112	343.603	1267346
e12	Margin	210603	0.111	0.012	0.636	23433.5	41708747		7848.87				e12	Margin	210603	0.057	0.01	0.773	12063.3	47141205		6166.41
	background	6646	0.074	0.025	0.128	489.696	1431677							background	4388	0.049	0.028	0.106	213.752	1000521
e14	Margin	230853	0.108	0.091	0.226	24932.1	44302626		11080.9				e14	Margin	230853	0.065	0.01	0.526	15005.4	49920022		3693.65
	background	5708	0.06	0.039	0.112	343.603	117634							background	5708	0.06	0.049	0.112	343.603	1203021
e15	Margin	207582	0.06	0.01	0.773	12454.9	28770982		9341.19				e15	Margin	207582	0.057	0.01	0.773	11832.2	39084341		3736.48
	background	4388	0.049	0.015	0.106	213.752	108702							background	4388	0.049	0.039	0.106	213.752	1039883
Average													Average									4351.55
3.7h WT+SB431542	ROI												3.7h WT+SB431542	ROI
e1	Margin	291952	0.132	0.021	0.621	38665.5	55407296		10930.1				e1	Margin	291952	0.048	0.01	0.286	14115	66642049		2436.94
	background	13771	0.095	0.06	0.236	1308.25	2885429							background	6601	0.04	0.019	0.08	264.498	1535142
e2	Margin	179820	0.106	0.01	0.514	19143.9	35992621		7096.01				e2	Margin	179820	0.038	0.007	0.526	6889.84	42007724		3473.26
	background	5904	0.067	0.019	0.179	395.177	1292414							background	17480	0.034	0.019	0.047	598.384	4120022
e4	Margin	248096	0.106	0.014	1.106	26386.6	50175273		11004.6				e4	Margin	248096	0.053	0.012	0.716	13166	56066164		3738.39
	background	8407	0.062	0.028	0.137	524.835	1857520							background	7317	0.038	0.026	0.121	280.839	1708177
e5	Margin	254954	0.131	0.01	0.407	33351.6	48673467		11680.5				e5	Margin	254954	0.054	0.009	0.452	13763.3	57491788		3820.08
	background	6869	0.085	0.039	0.144	581.781	1443062							background	3364	0.039	0.014	0.064	132.731	783458
e6	Margin	135478	0.232	0.068	0.888	31447.3	20633439		6112.92				e6	Margin	190457	0.058	0.012	0.537	10989.7	42587518		4514.19
	background	10558	0.187	0.066	0.317	1976.72	1765582							background	8770	0.051	0.034	0.082	447.08	1989017
e7	Margin	256558	0.106	0.019	0.357	27181.5	51530546		7170				e7	Margin	256558	0.036	0.009	0.457	9342.9	60194370		4981.42
	background	14664	0.078	0.037	0.135	1141.55	3127358							background	5759	0.033	0.017	0.064	188.965	1361758
e2	Margin	146201	0.175	0.017	0.888	25646.2	25393007		9856.48				e2	Margin	146201	0.044	0.009	0.691	6419.27	33716254		3056.64
	background	9334	0.108	0.043	0.273	1009.58	1861594							background	6486	0.03	0.023	0.058	196.231	1542670
e4	Margin	252128	0.134	0.017	0.699	33685.2	47566055		5194.71				e4	Margin	252128	0.047	0.007	0.753	11871.3	57723286		6576.65
	background	9423	0.113	0.041	0.205	1066.14	1854953							background	8465	0.04	0.021	0.088	337.783	1969347
Average									7525.6				Average									4074.7
4h WT+DMSO	ROI												4h WT+DMSO	ROI
e2	Margin	285928	0.167	0.032	0.472	47651.5	50118670		15055.7				e2	Margin	285928	0.064	0.012	0.827	18191.8	63057265		7612.5
	background	3739	0.114	0.088	0.142	425.28	733901							background	2248	0.059	0.037	0.08	132.139	500759
e3	Margin	188016	0.195	0.016	0.888	36632.1	31309725		12002				e3	Margin	193082	0.076	0.01	0.614	14657.1	41398414		6354.55
	background	25816	0.131	0.086	0.208	3371.47	4877423							background	4197	0.071	0.043	0.132	299.981	908030
e4	Margin	213912	0.079	0.003	0.161	16899	48783186		7914.74				e4	Margin	213912	0.06	0.01	0.58	12780.6	47575108		5507.6
	background	4939	0.042	0.028	0.058	209.074	1142537							background	9103	0.053	0.034	0.149	480.35	2056120
e5	Margin	161526	0.164	0.03	0.587	26416.2	28545520		12040.4				e5	Margin	161526	0.076	0.019	0.574	12244.1	34670407		4652.34
	background	4772	0.089	0.049	0.132	424.184	992260							background	5863	0.08	0.047	0.121	468.63	1244305
e6	Margin	264294	0.159	0.032	0.472	42022.7	50118670		11893.2				e6	Margin	266517	0.066	0.012	0.827	17590.1	63057265		9328.09
	background	3739	0.114	0.088	0.142	425.28	733901							background	2248	0.059	0.031	0.08	132.139	500759
e7	Margin	186559	0.186	0.016	0.888	34700	31309725		11753.2				e7	Margin	183703	0.066	0.01	0.614	12124.4	41398414		7899.23
	background	25816	0.123	0.086	0.208	3371.47	4877423							background	4197	0.071	0.023	0.132	299.981	908030
e8	Margin	221517	0.088	0.003	0.161	19493.5	48783186		11297.4				e8	Margin	219616	0.06	0.01	0.58	13177	47575108		6149.25
	background	4939	0.037	0.028	0.058	209.074	1142537							background	9103	0.053	0.032	0.149	480.35	2056120
e10	Margin	155192	0.142	0.03	0.587	22037.3	28545520		7914.79				e10	Margin	156298	0.082	0.019	0.574	12816.4	34670407		5783.03
	background	4772	0.091	0.049	0.132	424.184	992260							background	5863	0.08	0.045	0.121	468.63	1244305
Average									11753.2				Average									6031.75
4h WT+SB431542	ROI												4h WT+SB431542	ROI
e1	Margin	272800	0.046	0.002	0.076	12548.8	64751353		6001.6				e1	Margin	272800	0.056	0.01	0.493	15247.7	61204423		5972.48
	background	22632	0.024	0.01	0.051	533.326	5467356							background	7104	0.046	0.034	0.07	326.414	1629772
e2	Margin	258199	0.084	0.002	0.614	21707.9	54481103		6215.96				e2	Margin	258199	0.079	0.014	0.621	20269.9	55078560		7618.13
	background	9965	0.06	0.007	0.208	594.247	2217452							background	3778	0.069	0.049	0.176	260.595	822686
e3	Margin	170827	0.169	0.017	0.975	28869.8	33823609		10762.1				e3	Margin	170827	0.066	0.01	0.531	11350	37425712		8445.97
	background	4261	0.106	0.08	0.176	516.662	822379							background	10568	0.057	0.017	0.144	607.149	2363600
e4	Margin	178032	0.074	0.019	0.219	13128	38359329		8499.15				e4	Margin	178032	0.05	0.014	0.357	8866.88	40512200		4416.08
	background	11369	0.053	0.026	0.082	606.404	2564754							background	9202	0.039	0.025	0.106	355.876	2146872
e5	Margin	192430	0.182	0.06	1.045	34944.7	32746643		11660.7				e5	Margin	239848	0.056	0.01	1.106	13488.9	53781003		5094.19
	background	8769	0.121	0.088	0.299	1411.33	1546358							background	13195	0.051	0.035	0.114	677.069	2990402
e7	Margin	224750	0.142	0.023	0.568	31941.2	41880688		8342.5				e7	Margin	224750	0.077	0.019	0.594	17265.1	48111683		5128.58
	background	15373	0.105	0.062	0.171	1612.53	3081881							background	3760	0.067	0.054	0.103	252.135	821743
e8	Margin	180044	0.171	0.06	1.045	30787.5	32746643		9002.2				e8	Margin	180044	0.062	0.01	1.106	11162.7	53781003		6841.67
	background	7744	0.121	0.072	0.299	937.024	1546358							background	13195	0.051	0.024	0.114	672.945	2990402
e9	Margin	202922	0.148	0.023	0.568	30032.5	41880688		7913.96				e9	Margin	202922	0.075	0.019	0.594	15219.1	48111683		5275.97
	background	14423	0.109	0.089	0.171	1572.11	3081881							background	3760	0.065	0.049	0.103	244.4	821743
Average									8580.33				Average									6099.13
4.3h WT+DMSO	ROI												4.3h WT+DMSO	ROI
e1	Margin	257505	0.19	0.019	1.151	48972.2	42780196		15239.1				e1	Margin	257505	0.086	0.014	0.794	22254.9	53960956		9637.11
	background	22204	0.131	0.078	0.186	2901.7	4193200							background	7058	0.091	0.049	0.385	644.127	1460540
e2	Margin	240780	0.067	0.002	0.734	16222.9	52659526		6110.15				e2	Margin	240780	0.046	0.009	1.026	11079.5	55268132		5782.34
	background	7271	0.042	0.019	0.091	305.385	1683381							background	4845	0.042	0.022	0.303	205.405	1121731
e3	Margin	201828	0.098	0.007	0.222	19698.8	41216208		10616.5				e3	Margin	201828	0.104	0.012	0.794	20958.2	40654143		12279.6
	background	2282	0.062	0.045	0.106	158.42	496089							background	3252	0.133	0.043	0.286	433.616	611646
e4	Margin	184130	0.153	0.021	0.901	28165.6	33334855		17486.1				e4	Margin	184130	0.119	0.012	2.708	21959.8	35958657		12385.1
	background	4880	0.085	0.058	0.144	415.016	1023682							background	3563	0.077	0.052	0.176	275.778	760688
e5	Margin	287352	0.2	0.012	1.045	57535.8	46501678		14720.4				e5	Margin	287352	0.06	0.003	0.744	17130.7	63970978		7935.42
	background	1247	0.149	0.11	0.211	185.799	225815							background	2045	0.05	0.032	0.088	101.996	464951
e6	Margin	288074	0.209	0.021	0.915	60164.8	45740631		12920.6				e6	Margin	288074	0.079	0.01	0.815	22736.4	61377970		10349.2
	background	4066	0.164	0.142	0.205	664.883	711674							background	3780	0.069	0.043	0.171	259.902	823167
e7	Margin	293266	0.167	0.025	1.084	48914.2	51399766		16654.9				e7	Margin	293266	0.082	0.012	0.514	23945.1	62085109		11921.2
	background	5056	0.11	0.082	0.146	558.34	1000039							background	7282	0.071	0.041	0.159	516.07	1577666
e9	Margin	179814	0.185	0.021	1.126	33265.6	39459551		13486				e9	Margin	177928	0.12	0.012	0.794	21351.4	40654143		11921.2
	background	2832	0.11	0.078	0.158	311.52	8346232							background	3252	0.133	0.053	0.286	432.516	611646
Average									13392.5													10041.4
4.3h WT+SB431542	ROI												4.3h WT+SB431542	ROI
e1	Margin	165824	0.061	0.01	0.353	10038.1	36840882		6887.44				e1	Margin	165994	0.034	0.002	0.643	5702.46	39150392		4540.5
	background	15270	0.053	0.019	0.091	810.925	3448103							background	4306	0.025	0.007	0.043	107.82	1036538
e2	Margin	190963	0.05	0	2.708	9482.71	43792372		6236.34				e2	Margin	183538	0.062	0.009	0.607	11304.2	40697633		7266.38
	background	5057	0.031	0.017	0.139	155.464	1202042							background	5599	0.044	0.022	0.08	243.904	1291573
e3	Margin	164061	0.055	0.002	0.251	9015.93	37010626		5406.59				e3	Margin	164061	0.067	0.012	0.827	11036.8	35875615		5786.81
	background	16581	0.038	0.022	0.051	622.191	3878333							background	2864	0.047	0.032	0.068	135.516	655002
e4	Margin	314658	0.132	0.021	0.815	41573.5	59724733		7905.11				e4	Margin	314658	0.09	0.01	0.959	28199.5	65655660		15298.6
	background	39294	0.107	0.064	0.254	4199.6	7839879							background	3562	0.058	0.041	0.313	207.432	794924
e5	Margin	175670	0.057	0.03	0.353	10013.2	36840882		7905.15				e5	Margin	175670	0.034	0.002	0.643	5972.78	39150392		4567.42
	background	15270	0.05	0.012	0.091	763.5	3448103							background	3899	0.025	0.008	0.043	97.475	1036538
e6	Margin	182705	0.039	0	2.708	7125.49	43792372		4750.33				e6	Margin	182705	0.064	0.009	0.607	11693.1	40697633		7308.2
	background	5042	0.027	0.013	0.129	136.134	1202042							background	5599	0.042	0.024	0.08	235.158	1291573
e8	Margin	150638	0.053	0.002	0.251	7983.81	37010626		4669.78				e8	Margin	150638	0.061	0.012	0.827	9188.92	35875615		7230.62
	background	16581	0.042	0.022	0.051	696.402	3878333							background	2269	0.047	0.013	0.068	106.643	655002
e9	Margin	218484	0.142	0.021	0.815	31024.7	59724733		6554.52				e9	Margin	218484	0.067	0.01	0.959	14638.4	65655660		5899.07
	background	39294	0.112	0.064	0.254	4400.93	7839879							background	3562	0.058	0.04	0.313	206.596	794924
Average									6608.87				Average									8223.06
4.7h WT+DMSO	ROI												4.7h WT+DMSO	ROI
e1	Margin	123324	0.156	0.007	0.944	22376.5	21711618		9797.43				e1	Margin	195878	0.041	0.003	0.119	8127.76	45420525		7148.37
	background	4825	0.102	0.017	0.064	200.9	1118238							background	6253	0.04	0.005	0.054	248.869	1455021
e2	Margin	287588	0.104	0.016	0.574	29869.5	58033538		9450.79				e2	Margin	287588	0.128	0.017	0.815	36776.5	55184303		20096.4
	background	7126	0.071	0.049	0.103	503.707	1544298							background	2492	0.091	0.058	0.205	227.487	515378
e3	Margin	305036	0.207	0.012	0.561	63285.8	48652479		6549.12				e3	Margin	305036	0.11	0.009	0.929	33476.8	60655537		21885.4
	background	3792	0.186	0.119	0.286	704.648	631282							background	5791	0.114	0.038	0.353	658.572	1138365
e4	Margin	291621	0.057	0.005	0.168	16500.8	65373097		12418.2				e4	Margin	291621	0.133	0.009	0.862	38739.2	55225826		21241.9
	background	4138	0.034	0.014	0.054	138.655	976923							background	7782	0.102	0.06	0.264	795.081	1569844
e5	Margin	287842	0.278	0.016	1.26	79933.6	39500993		29273.4				e5	Margin	287842	0.093	0.007	0.815	26660.9	59701045		11693.1
	background	3617	0.176	0.097	0.276	635.505	616846							background	8897	0.139	0.052	0.888	1235.85	1656744
e6	Margin	302837	0.128	0.009	0.438	38914.2	57686563		8933.37				e6	Margin	302837	0.106	0.009	0.888	32251.9	60639037		14081.7
	background	1224	0.099	0.084	0.126	121.75	248263							background	2465	0.087	0.06	0.171	215.408	514240
e7	Margin	345856	0.234	0.025	0.901	80987.1	52569296		23920.9				e7	Margin	345856	0.131	0.017	0.915	45188.3	65712163		22707.6
	background	2315	0.165	0.072	0.132	243.039	463708							background	7067	0.096	0.065	0.27	678.41	1446254
e8	Margin	319083	0.261	0.023	1.084	83172.6	45347922		27971.3				e8	Margin	319083	0.101	0.01	1.151	32292.3	64899524		20805.4
	background	3877	0.173	0.11	0.245	672.332	664095							background	4813	0.088	0.036	0.245	422.824	1003372
Average									16039.3				Average									17457.5
4.7h WT+SB431542	ROI												4.7h WT+SB431542	ROI
e1	Margin	181679	0.146	0.019	0.472	26449.1	33296060		6646.09				e1	Margin	181679	0.086	0.014	2.708	15591.7	38111044		9414.63
	background	2987	0.109	0.08	0.151	324.811	593136							background	2170	0.063	0.034	0.101	135.739	479244
e2	Margin	200491	0.138	0.016	1.561	35653.3	34410361		11193.4				e2	Margin	200491	0.098	0.009	1.176	19551.5	41027928		12734.8
	background	6454	0.122	0.084	0.192	789.139	1243215							background	2798	0.052	0.034	0.126	146.418	632634
e3	Margin	123624	0.048	0.009	0.477	5957.18	28236839		2248.46				e3	Margin	247248	0.059	0.009	0.992	14595.2	27544622
	background	3903	0.044	0.03	0.06	171.166	899741							background	4622	0.049	0.02	0.084	224.702	1053930
e4	Margin	248511	0.082	0.016	2.708	20492	52602553		4338.76				e4	Margin	248511	0.096	0.014	2.708	23892.7	50931868		12212.7
	background	1600	0.065	0.058	0.076	104.17	351209							background	3833	0.08	0.047	0.197	305.508	814037
e5	Margin	66310	0.118	0.007	0.607	7815.64	13038065		4898				e5	Margin	198930	0.076	0.014	0.447	15118.7	14230378		13129.4
	background	3219	0.044	0.012	0.106	140.68	742730							background	834	0.046	0.01	0.064	38.696	191147
e6	Margin	118991	0.107	0.016	0.944	12695.4	23836086		1986.17				e6	Margin	118991	0.083	0.012	0.804	9826.5	25174671		8398.61
	background	4793	0.09	0.052	0.161	432.081	993532							background	9046	0.072	0.012	0.26	647.811	1958374
e7	Margin	237022	0.116	0.014	0.394	27532.2	46414679		5252.15				e7	Margin	237022	0.092	0.012	1.106	21743.7	49247783		18899.4
	background	3442	0.094	0.064	0.192	323.036	707416							background	5173	0.031	0.012	0.091	158.709	1229309
e8	Margin	221124	0.157	0.019	0.992	34819.7	39803732		7400.32				e8	Margin	221124	0.091	0.014	0.794	20161.1	45817947		11537.3
	background	4826	0.124	0.062	0.213	596.401	926950							background	8318	0.088	0.039	0.219	728.208	1734861
e9	Margin	220410	0.18	0.014	0.555	39680.2	37642132		6177.85				e9	Margin	220410	0.07	0.007	0.901	15502.2	47936381		10653.2
	background	8549	0.152	0.07	0.373	1301.07	1540888							background	6229	0.037	0.022	0.054	228.282	1459880
Average									5571.25				Average									12122.5
5h WT+DMSO	ROI												5h WT+DMSO	ROI
e1	Margin	137002	0.071	0.009	0.555	9701.58	29810126		5180.51				e1	Margin	137002	0.1	0.012	0.804	13641.1	27916350		8161.02
	background	3315	0.033	0.014	0.068	109.459	783591							background	6925	0.081	0.04	0.114	557.965	1466932
e2	Margin	222895	0.085	0.007	1.929	19017.9	46826920		8096.09				e2	Margin	222895	0.085	0.007	1.064	18998.9	47138199		11420.4
	background	4288	0.077	0.049	0.097	328.797	916935							background	3840	0.065	0.034	0.137	248.694	843727
e4	Margin	85798	0.128	0.014	0.531	10983.2	16503535		5663.7				e4	Margin	207145	0.099	0.014	1.561	20565.6	42852767		14351.3
	background	6599	0.095	0.062	0.168	629.115	1351771							background	128997	0.059	0.03	0.156	7580.84	28734542
e6	Margin	199150	0.118	0.014	0.385	23500.7	39140217		12746.6				e6	Margin	199150	0.092	0.009	1.151	18377.2	41686168		13398.4
	background	18306	0.054	0.017	0.135	988.524	3944417							background	7161	0.045	0.025	0.135	322.95	1646306
e7	Margin	188127	0.23	0.054	0.614	43328.3	28715099		10782.4				e7	Margin	188127	0.116	0.023	0.614	21739.2	36951920		13273.5
	background	2706	0.173	0.126	0.242	469.103	463442							background	8873	0.079	0.045	0.219	696.98	1889038
e8	Margin	304395	0.204	0.023	0.901	62086.2	49449599		12165.4				e8	Margin	304395	0.085	0.01	0.509	25995.8	63967362		18385.9
	background	4518	0.164	0.126	0.211	739.478	790719							background	12785	0.051	0.025	0.108	648.213	2901691
e9	Margin	280310	0.223	0.026	0.753	62492.8	43177569		2506.47				e9	Margin	280310	0.107	0.014	0.944	29933.2	56268042		14235.9
	background	19764	0.214	0.164	0.317	4224.69	3083180							background	4210	0.077	0.056	0.117	323.136	899781
Average									8163.02				Average									14177.6
5h WT+SB431542	ROI												5h WT+SB431542	ROI
e3	Margin	166971	0.057	0.005	0.691	9517.35	38008733		3673.36				e3	Margin	170501	0.092	0.007	1.084	15619.4	35349231		9822.32
	background	34358	0.035	0.016	0.13	1202.53	7719723							background	3968	0.059	0.034	0.097	235.817	882543
e4	Margin	96867	0.102	0.01	0.628	9845.98	19680077		3259.03				e4	Margin	224959	0.075	0.007	0.875	16805.2	48526555		12530.9
	background	3989	0.068	0.045	0.11	269.607	870909							background	586	0.042	0.019	0.058	24.758	135586
e5	Margin	240533	0.185	0.012	0.753	44498.6	40133477		3848.53				e5	Margin	238183	0.077	0.007	0.753	18293.9	51075017		11148.4
	background	7512	0.169	0.035	0.313	1269.53	1266822							background	10380	0.046	0.03	0.074	474.758	2382516
e6	Margin	202499	0.037	0.003	0.126	7411.12	47478764		2146.15				e6	Margin	202499	0.103	0.009	0.763	20814.7	40857368		15752.3
	background	7641	0.026	0.007	0.041	197.757	1835956							background	1356	0.066	0.025	0.099	89.139	297474
e7	Margin	175458	0.194	0.023	0.975	34054.7	28962724		1419.51				e7	Margin	175458	0.071	0.014	0.734	12425.6	38066906		8916.45
	background	6788	0.186	0.056	0.197	786.289	1326932							background	602	0.029	0.02	0.045	17.188	143769
e8	Margin	209227	0.183	0.023	1.084	38288.5	35438834		6067.58				e8	Margin	209088	0.085	0.01	0.699	17675.5	43969015		5548.4
	background	2983	0.154	0.039	0.166	459.382	571387							background	2235	0.065	0.058	0.082	145.212	490747
e9	Margin	202499	0.151	0.023	1.084	30577.3	28906624		5264.97				e9	Margin	202499	0.103	0.009	0.763	20814.7	40857368		7449.8
	background	1887	0.125	0.049	0.152	235.875	460895							background	1356	0.066	0.012	0.099	89.139	297474
Average									3402.36				Average									11634.1
6h WT+DMSO	ROI												6h WT+DMSO	ROI
e1	Margin	209581	0.276	0.026	0.699	57755.9	28653715		3055.3				e1	Margin	209581	0.077	0.009	0.975	16148.4	45360699		8813.05
	background	9969	0.261	0.11	0.498	2399.13	1465972							background	20267	0.042	0.035	0.072	845.329	4694902
e2	Margin	207698	0.199	0.032	0.549	41254.2	33822496		4699.36				e2	Margin	207698	0.086	0.012	1.327	17818.4	44317844		11172.1
	background	22953	0.176	0.045	0.402	4043.35	3914460							background	8841	0.036	0.032	0.054	319.202	2074636
e3	Margin	424372	0.075	0.012	0.555	31677.8	91159637		2820.51				e3	Margin	424372	0.078	0.019	0.429	33037	90592898		14789
	background	20234	0.068	0.052	0.117	1377.13	4411708							background	4636	0.062	0.043	0.106	289.052	1024232
e4	Margin	308215	0.128	0.021	0.514	39460.9	58736323		1858.64				e4	Margin	308215	0.077	0.017	0.827	23747.2	66257096		12343.2
	background	17014	0.122	0.08	0.202	2069.68	3281253							background	19353	0.054	0.037	0.084	1048.9	4356464
e7	Margin	437335	0.128	0.026	0.708	56012.8	83219917		2220.64				e7	Margin	437335	0.088	0.019	1.176	38490.5	91527761		10501
	background	34887	0.123	0.078	0.279	4274.43	6714660							background	28321	0.064	0.043	0.186	1802.86	6238085
e8	Margin	375441	0.079	0.014	0.487	29603.6	79893270		3322.69				e8	Margin	375441	0.078	0.017	0.929	29459.1	80045595		14816.9
	background	30545	0.07	0.052	0.119	2140.85	6629035							background	13544	0.063	0.039	0.128	855.372	2986861
Average									2996.19				Average									12072.5
6h WT+SB431542	ROI												6h WT+SB431542	ROI
e1	Margin	125072	0.142	0.017	0.411	17766.5	23210410		2882.93				e1	Margin	125072	0.079	0.017	0.394	9898.02	26612699		4519.93
	background	16083	0.119	0.041	0.189	1914.08	3121397							background	10449	0.076	0.043	0.2	794.773	2237192
e4	Margin	108451	0.131	0.025	0.555	14175.8	20586410		2788.44				e4	Margin	108451	0.109	0.028	0.482	11778.1	21596825		3318.88
	background	15534	0.105	0.032	0.225	1635.58	3119239							background	18973	0.116	0.078	0.452	2193.01	3709582
e6	Margin	141863	0.113	0.019	0.394	16025.2	27993815		1697.04				e6	Margin	193857	0.072	0.017	0.324	14003.3	41899916		6442.9
	background	6723	0.101	0.056	0.166	677.935	1360662							background	6511	0.061	0.039	0.103	399.183	1442049
e7	Margin	140692	0.127	0.019	0.607	17931.2	27073661		2595.79				e7	Margin	140692	0.064	0.016	0.487	8991.11	31000261		4488.97
	background	8804	0.109	0.045	0.149	794.339	1825736							background	9943	0.044	0.032	0.068	436.195	2291960
e8	Margin	125832	0.112	0.021	0.514	14115.7	24875590		1532.49				e8	Margin	125832	0.085	0.019	0.279	10751.2	26395436		4207.89
	background	13682	0.1	0.049	0.179	1364.15	2774571							background	10483	0.082	0.052	0.114	855.803	2215531
e9	Margin	125402	0.112	0.021	0.514	14115.7	24875590		1324.68				e9	Margin	125402	0.112	0.021	0.514	14115.7	24875590		7970.99
	background	13682	0.102	0.039	0.168	1364.15	2774571							background	13682	0.102	0.049	0.168	1364.15	2774571
Average									2136.9				Average									5158.26

## Sheet: Mea
ndr1(Dig 549)													ndr2(Flu 488)
		Area	Mean	Min	Max	IntDen	RawIntDen		Total Intensity						Area	Mean	Min	Max	IntDen	RawIntDen		Total Intensity
3.7h Mea+DMSO	ROI												3.7h Mea+DMSO	ROI
e1	Margin	137146	0.091	0.009	0.6	12427	28489937		6804.03				e1	Margin	137146	0.04	0.009	0.482	5514.41	31899829		2360.05
	background	3106	0.062	0.041	0.11	191.392	687393							background	4675	0.032	0.023	0.051	147.625	1108557
e3	Margin	105047	0.072	0.017	0.543	7517.33	22755065		4891.15				e3	Margin	105047	0.035	0.007	0.35	3640.61	24751923		1644.71
	background	3929	0.061	0.025	0.192	239.783	870824							background	3741	0.026	0.019	0.047	99.098	897533
e6	Margin	118887	0.067	0.007	0.402	8006.42	25992726		5034.24				e6	Margin	118887	0.036	0.007	0.804	4234.18	27969566		1143.12
	background	2373	0.057	0.025	0.137	134.083	531444							background	1515	0.033	0.026	0.047	49.328	358432
e8	Margin	233789	0.059	0.007	0.2	13791.4	52091228		9349.4				e8	Margin	145631	0.043	0.009	0.666	6326.32	33632688		2685.54
	background	7995	0.039	0.019	0.066	313.433	1863071							background	8937	0.036	0.025	0.097	322.887	2097299
e12	Margin	190693	0.094	0.017	0.296	17894.8	39239261		9313.6				e12	Margin	190693	0.03	0.005	0.303	5767.12	45374476		2143.96
	background	3728	0.084	0.045	0.132	312.801	783778							background	8018	0.025	0.019	0.039	202.055	1929360
e15	Margin	109828	0.049	0.007	1.128	5385.94	25044705		3299.21				e15	Margin	109828	0.033	0.005	0.621	3632.91	25969746		1765.84
	background	1891	0.035	0.019	0.072	67.103	444455							background	2385	0.026	0.017	0.056	62.157	572777
e16	Margin	173696	0.081	0.021	0.975	14115.8	36786648		4388.87				e16	Margin	173696	0.032	0.009	0.651	5567.84	41159092		1225.44
	background	367	0.072	0.056	0.084	26.387	79313							background	1038	0.031	0.025	0.041	31.787	246672
e17	Margin	157426	0.043	0.003	0.361	6769.32	37768646		6297.04				e17	Margin	157426	0.064	0.012	0.452	10079.1	34679965		2207.83
	background	1033	0.02	0.003	0.028	20.309	251759							background	3617	0.05	0.023	0.082	179.383	822976
Average									6582.62				Average									1897.06
3.7h Mea+SB431542	ROI												3.7hMea+SB431542	ROI
e1	Margin	137146	0.091	0.009	0.6	12427	28489937		3923.96				e1	Margin	137146	0.04	0.009	0.482	5514.41	31899829		2360.05
	background	3106	0.062	0.041	0.11	191.392	687393							background	4675	0.032	0.023	0.051	147.625	1108557
e2	Margin	192808	0.188	0.026	1.176	36247.9	31236483		4627.39				e2	Margin	192808	0.048	0.014	0.643	9159.99	44100745		2604.52
	background	9347	0.164	0.084	0.216	1532.91	1753213							background	4705	0.034	0.028	0.043	159.92	1109471
e3	Margin	161652	0.081	0.014	0.815	13087.6	34267721		4358.36				e3	Margin	161652	0.05	0.012	0.219	8079.91	36750485		2422.09
	background	4467	0.054	0.043	0.072	239.313	1006969							background	2777	0.044	0.035	0.058	121.516	640278
e6	Margin	337012	0.1999	0.019	0.794	67368.7	52783280		8054.59				e6	Margin	337012	0.054	0.01	0.574	18116.1	75987134		2276.57
	background	94143	0.176	0.084	0.331	16569.2	16249318							background	13170	0.047	0.037	0.119	621.737	3012784
e9	Margin	202084	0.151	0.019	0.614	30542.8	36747891		7505.26				e9	Margin	202084	0.014	0.002	0.239	2826.14	49900609		199.049
	background	39159	0.114	0.043	0.208	4464.13	8151962							background	17871	0.013	0.009	0.039	223.613	4427710
e10	Margin	244429	0.16	0.017	0.875	39097.2	43555349		5610.43				e10	Margin	14151	0.084	0.051	0.146	1182.21	2977807		771.833
	background	98607	0.137	0.034	0.257	13509.2	19230437							background	16141	0.029	0.021	0.082	466.263	3851236
e11	Margin	239148	0.137	0.016	0.503	28651.9	44900563		7367.76				e11	Margin	239148	0.072	0.016	0.783	17099.3	51771586		2989.54
	background	1706	0.089	0.06	0.101	143.257	358589							background	1787	0.059	0.043	0.07	105.315	397881
e13	Margin	175157	0.161	0.026	0.487	24286.9	31079870		6946.31				e13	Margin	175157	0.065	0.021	0.462	11329.5	38496383		294.584
	background	42511	0.099	0.058	0.142	4208.59	8941221							background	4659	0.063	0.049	0.091	294.439	1027234
Average									6049.26				Average									1739.78
4h Mea+DMSO	ROI												4h Mea+DMSO	ROI
e1	Margin	211717	0.067	0.01	0.289	14290	46261131		3069.01				e1	Margin	211717	0.096	0.014	0.531	20244.5	43421031		131.434
	background	1187	0.053	0.028	0.066	62.441	268172							background	7816	0.095	0.068	0.13	743.195	1601605
e3	Margin	72394	0.275	0.002	1.561	19882.3	10368197		4751.95				e3	Margin	131089	0.093	0.016	0.561	12147.4	27065020		5068.59
	background	7068	0.209	0.103	0.385	1479.44	1118679							background	11910	0.099	0.054	0.2	1173.73	2421429
e5	Margin	223006	0.291	0.035	0.944	64918.7	30159338		14965.4				e5	Margin	223006	0.078	0.025	0.381	17423.2	47540365		2258.75
	background	45517	0.224	0.103	0.58	10195.8	7291952							background	16153	0.068	0.052	0.179	1091.21	3526376
e15	Margin	110662	0.092	0.023	1.026	10178.9	22896629		6084.39				e15	Margin	110662	0.122	0.028	0.324	13460.7	21378368		291.936
	background	16341	0.067	0.037	0.254	1101.42	3570024							background	3841	0.119	0.072	0.219	455.871	745752
e2	Margin	147676	0.055	0.012	0.514	8132.86	33212030		4588.64				e2	Margin	147676	0.098	0.016	0.482	14539.7	30138960		2430.29
	background	2174	0.039	0.024	0.06	83.741	507326							background	6534	0.11	0.082	0.164	719.94	1293248
e4	Margin	140348	0.166	0.026	0.658	23291.6	24599431		12344.4				e4	Margin	140348	0.163	0.034	0.549	22939.5	24718364		624.136
	background	1744	0.119	0.078	0.151	207.357	338416							background	4463	0.159	0.123	0.222	709.651	789737
Average									7633.96				Average									1800.85
4h Mea+SB431542	ROI												4h Mea+SB431542	ROI
e1	Margin	212207	0.13	0.032	1.293	27586.9	33171843		7215.04				e1	Margin	212207	0.103	0.034	0.317	21880.6	42787095		1933.13
	background	11650	0.123	0.096	0.257	1435.28	2239554							background	37716	0.094	0.056	0.186	3535.1	7755648
e3	Margin	122413	0.139	0.028	0.915	17049.3	22733716		5420.05				e3	Margin	122413	0.093	0.032	0.373	11405.7	25209085		3081.65
	background	8737	0.095	0.056	0.154	831.822	1790489							background	4146	0.095	0.068	0.137	392.539	850281
e13	Margin	86237	0.135	0.017	2.708	11603.7	16850981		4101.13				e13	Margin	86237	0.089	0.019	0.424	7691.49	17949971		1827.38
	background	3971	0.087	0.062	0.174	345.795	828895							background	18889	0.068	0.035	0.197	1285.91	4120553
e2	Margin	140018	0.109	0.017	1.128	15260.1	27873993		7979.19				e2	Margin	140018	0.057	0.016	0.242	8020.15	31303988		599.197
	background	4692	0.097	0.052	0.121	453.347	958107							background	14517	0.053	0.037	0.099	767.399	3277925
e5	Margin	184708	0.089	0.009	1.084	16446.6	38566678		4994.74				e5	Margin	184708	0.051	0.01	0.744	9405.39	41941230		169.985
	background	10757	0.087	0.062	0.192	940.133	2244220							background	16628	0.05	0.035	0.2	823.883	3783561
e7	Margin	149967	0.138	0.035	0.783	20673.5	27948871		9875.87				e7	Margin	149967	0.065	0.025	0.568	9794.65	32916851		346.732
	background	5472	0.091	0.072	0.168	496.056	1132720							background	12591	0.063	0.054	0.101	787.073	2780462
e8	Margin	177001	0.15	0.026	0.482	26548.3	32344982		9025.16				e8	Margin	177001	0.049	0.017	0.365	8609.81	40366183		290.762
	background	9275	0.099	0.078	0.154	915.529	1884640							background	6937	0.047	0.037	0.064	323.367	1588953
e9	Margin	118936	0.13	0.039	0.628	15456.5	22552151		7131				e9	Margin	118936	0.059	0.023	0.222	6981.49	26504014		321.072
	background	2084	0.083	0.07	0.106	174.003	438509							background	4110	0.056	0.047	0.082	228.24	922279
Average									6967.77				Average									1071.24
4.3h Mea+DMSO	ROI												4.3h Mea+DMSO	ROI
e1	Margin	214611	0.17	0.032	0.607	36444.2	37246148		7900.98				e1	Margin	214611	0.077	0.014	0.457	16612.3	45869587		3521.06
	background	19593	0.133	0.091	0.289	2609.7	3682148							background	6351	0.061	0.039	0.086	388.628	1406813
e2	Margin	175803	0.125	0.012	0.574	21890.7	33873001		8002.29				e2	Margin	175803	0.033	0.003	0.154	5776.38	41573421		2436.12
	background	3145	0.079	0.049	0.106	247.569	669210							background	7229	0.03	0.019	0.064	215.779	1721046
e3	Margin	145696	0.115	0.014	0.975	16795.9	28543876		10093.9				e3	Margin	145696	0.073	0.01	0.407	10570.3	31464328		3139.82
	background	1995	0.106	0.046	0.128	212.312	398215							background	3632	0.074	0.051	0.128	267.946	781691
e4	Margin	206272	0.071	0.019	0.643	14564.8	44818557		9614.28				e4	Margin	206272	0.086	0.017	0.482	17720.3	43250516		7613.02
	background	4891	0.057	0.024	0.171	280.464	1093177							background	3681	0.06	0.049	0.08	222.684	816636
e3	Margin	183074	0.102	0.011	0.775	18673.5	28543876		7139.89				e3	Margin	183074	0.067	0.03	0.363	12266	42373126		3295.33
	background	1875	0.106	0.063	0.128	198.75	296136							background	2286	0.052	0.049	0.128	118.872	592552
e4	Margin	189241	0.065	0.017	0.569	12300.7	34720539		6434.19				e4	Margin	189241	0.077	0.012	0.396	14571.6	32420725		6623.44
	background	3782	0.046	0.031	0.196	173.972	972562							background	3782	0.06	0.042	0.08	226.92	623543
Average									8902.85				Average									4177.5
4.3h Mea+SB431542	ROI												4.3h Mea+SB431542	ROI
e1	Margin	171982	0.103	0.034	0.716	17711.5	34665739		4640.9				e1	Margin	171982	0.042	0.012	0.682	7137.81	39883210		2150.33
	background	9435	0.076	0.051	0.137	720.897	2018162							background	30805	0.029	0.016	0.108	897.283	7346156
e4	Margin	255431	0.188	0.037	0.827	47973.7	42643267		5316.74				e4	Margin	255431	0.045	0.01	0.338	11393.7	58801949		1176.43
	background	45740	0.167	0.07	0.744	7638.58	8334266							background	30805	0.04	0.021	0.176	1223.15	7170875
e5	Margin	176586	0.194	0.034	0.537	34254.3	28991605		5294.16				e5	Margin	176586	0.067	0.012	0.503	11873.1	38598039		924.803
	background	11477	0.164	0.099	0.276	1882.23	2052140							background	5468	0.062	0.041	0.149	338.734	1209296
e7	Margin	291341	0.318	0.037	0.992	92646.4	35544976		5535.48				e7	Margin	291341	0.047	0.009	0.636	13589.8	66747746		1353.51
	background	37271	0.299	0.121	0.415	9455.59	5339945							background	13395	0.042	0.034	0.054	557.699	3103526
e9	Margin	149696	0.103	0.03	0.699	15473	30184304		4994.28				e9	Margin	149696	0.053	0.017	0.838	7974.12	33807918		2884.46
	background	7266	0.07	0.052	0.114	510.146	1576480							background	1077	0.034	0.018	0.058	36.889	253817
e10	Margin	178528	0.148	0.021	0.514	26483.9	32518197		5596.15				e10	Margin	178528	0.06	0.017	0.369	10782.3	39636481		963.244
	background	48078	0.117	0.076	0.257	5616.38	9373036							background	2183	0.055	0.043	0.099	120.734	490141
e12	Margin	153516	0.067	0.012	0.197	10252.5	33595060		3958.39				e12	Margin	153516	0.045	0.009	0.628	6895.9	35316316		1369.32
	background	3057	0.041	0.03	0.054	126.424	708757							background	2612	0.036	0.026	0.052	93.567	613347
e15	Margin	200560	0.151	0.025	0.407	30324.3	36263623		6457.68				e15	Margin	200560	0.066	0.017	1.128	13233.7	43985551		3406.31
	background	11221	0.119	0.049	0.164	1330.44	2178109							background	8931	0.049	0.034	0.091	438.186	2034347
Average									5224.22				Average									1778.55
4.7h Mea+DMSO	ROI												4.7h Mea+DMSO	ROI
e1	Margin	162880	0.071	0.009	0.377	11543.9	35326011		8123.44				e1	Margin	148845	0.04	0.01	0.377	5926.94	34642255		2056.97
	background	12399	0.043	0.021	0.074	536.901	2862181							background	5806	0.035	0.026	0.082	201.271	1367002
e2	Margin	142060	0.118	0.016	1.045	16736.4	27838911		10343.7				e2	Margin	214170	0.059	0.01	0.457	12615.6	47719295		4691.36
	background	1278	0.064	0.045	0.101	81.73	281305							background	939	0.049	0.037	0.072	46.062	213882
e3	Margin	202589	0.076	0.012	0.568	15454.4	43384911		9376.72				e3	Margin	202589	0.038	0.007	0.179	7734.67	47335585		3885.48
	background	2048	0.048	0.03	0.068	98.284	467643							background	4146	0.028	0.019	0.041	116.357	991093
e4	Margin	208328	0.12	0.035	0.838	24954.9	40388782		9538.61				e4	Margin	208328	0.084	0.019	0.52	17415.5	43916732		5749.14
	background	787	0.074	0.051	0.108	58.107	169346							background	814	0.069	0.056	0.095	56.508	176923
e5	Margin	178047	0.061	0.009	1.628	10789	39524223		9186.55				e5	Margin	178047	0.066	0.012	0.346	11711.7	39058852		5658.13
	background	3482	0.048	0.009	0.07	168.023	794560							background	28162	0.055	0.034	0.13	1552.41	6325871
e6	Margin	146058	0.147	0.021	1.026	21468.3	26871845		12704.8				e6	Margin	191245	0.078	0.021	0.429	14955.5	40766262		7114.45
	background	12748	0.077	0.06	0.139	977.196	2724985							background	1355	0.068	0.041	0.095	91.893	295662
e7	Margin	177151	0.182	0.021	0.975	32224.2	29862960		16280.6				e7	Margin	177151	0.08	0.014	0.561	14144.8	37639771		5818.71
	background	6790	0.163	0.09	0.242	1104.15	1191336							background	20370	0.075	0.047	0.26	1531.49	4369815
e8	Margin	150538	0.18	0.03	0.682	27090.1	25573074		16251.4				e8	Margin	149140	0.044	0.01	0.216	6496.43	34418803		3364.49
	background	7348	0.137	0.072	0.2	1003.42	1368787							background	2679	0.031	0.021	0.049	83.837	635675
Average									11475.7				Average									4792.34
4.7h Mea+SB431542	ROI												4.7h Mea+SB431542	ROI
e1	Margin	122946	0.096	0.021	0.245	11782.1	25207102		2561.11				e1	Margin	122946	0.056	0.017	0.447	6832.99	27600581		2529.88
	background	5112	0.075	0.041	0.084	282.23	1148017							background	4780	0.052	0.035	0.082	247.662	1081948
e2	Margin	228519	0.075	0.012	0.901	17069.2	49138778		2901.01				e2	Margin	194862	0.061	0.019	0.827	11931.7	43204238		1019.39
	background	4279	0.062	0.052	0.103	266.224	945603							background	8391	0.056	0.043	0.144	472.073	1879962
e3	Margin	159314	0.168	0.016	0.915	26841	27904126		6130.23				e3	Margin	159314	0.085	0.017	0.487	13490.4	33466584		426.608
	background	39634	0.13	0.076	0.189	5133.93	7504310							background	28139	0.082	0.066	0.197	2303.47	5944570
e4	Margin	252589	0.315	0.021	1.084	79535.1	32636251		9567.9				e4	Margin	252589	0.072	0.014	0.338	18299.7	54543001		1123.64
	background	130712	0.277	0.047	0.725	36207.2	18553441							background	12719	0.068	0.054	0.166	864.887	2773613
e6	Margin	218380	0.074	0.007	0.467	16062.2	47162797		8637.29				e6	Margin	218380	0.055	0.012	0.568	12083	49052019		727.201
	background	33757	0.034	0.022	0.112	1135.85	7966754							background	12467	0.052	0.039	0.091	647.232	2821186
e7	Margin	254004	0.186	0.03	0.493	47280.9	42417263		8926.35				e7	Margin	254004	0.044	0.012	0.794	11162.7	58556096		2780.55
	background	7810	0.151	0.078	0.239	1179.31	1423871							background	3330	0.033	0.026	0.049	108.556	787771
e12	Margin	197192	0.092	0.019	0.901	18232	40695344		3048.17				e12	Margin	197192	0.063	0.016	0.424	12398.6	43526427		369.901
	background	14756	0.077	0.047	0.126	1136.21	3227693							background	12055	0.061	0.047	0.117	741.282	2668616
Average									4655.56				e8	Margin	218380	0.055	0.012	0.568	12083	49052019		945.581
														background	12467	0.052	0.051	0.091	647.232	2821186
													Average									1282.45
5h Mea+DMSO	ROI												5h Mea+DMSO	ROI
e2	Margin	287740	0.064	0.007	0.276	18299.3	63452721		14271				e2	Margin	287740	0.086	0.012	0.594	24634.3	60387327		10535
	background	3314	0.034	0.014	0.054	112.1	781785							background	2953	0.049	0.029	0.121	144.697	640502
e3	Margin	232802	0.306	0.03	0.815	71135.4	29638942		16892.6				e3	Margin	232802	0.11	0.014	0.708	25658.7	46419200		11457.8
	background	19873	0.233	0.192	0.283	4631.06	2964444							background	1220	0.061	0.026	0.08	74.932	270211
e4	Margin	195560	0.118	0.007	0.6	23006	38431454		15965.9				e4	Margin	328610	0.154	0.012	2.708	50659.5	59774097		18784.3
	background	2912	0.036	0.026	0.066	105.782	683011							background	262	0.097	0.078	0.126	25.375	53468
e5	Margin	192353	0.26	0.035	1.561	50104.9	27216838		12788.4				e5	Margin	192353	0.07	0.017	0.509	13527.2	41807570		4101.89
	background	16108	0.194	0.135	0.286	3284.89	2572107							background	9075	0.049	0.025	0.088	441.131	2069510
e6	Margin	266461	0.079	0.012	0.353	21050.4	23743122		14388.9				e6	Margin	266461	0.077	0.014	0.827	20646.1	57006941		11586.4
	background	4171	0.056	0.025	0.086	232.504	935546							background	7418	0.065	0.034	0.166	478.591	1631156
e7	Margin	259956	0.068	0.014	0.298	17677	23743122		14817.5				e7	Margin	259956	0.065	0.013	0.798	16897.1	49667233		9878.33
	background	3348	0.043	0.011	0.092	143.964	882237							background	5643	0.045	0.027	0.186	253.935	1511623
Average									14861.3				Average									11293.1
5h Mea+SB431542	ROI												5h Mea+SB431542	ROI
e2	Margin	89354	0.041	0.01	0.636	3665.11	20748489		1967.39				e2	Margin	89354	0.054	0.012	0.219	4802.16	20143650		602.518
	background	4385	0.026	0.019	0.043	114.747	1052810							background	6844	0.047	0.028	0.121	320.745	1567174
e3	Margin	244119	0.112	0.025	1.176	27451.4	48258177		10119				e3	Margin	244119	0.075	0.021	0.42	18203.1	52462328		2579.53
	background	51503	0.093	0.071	0.216	3612.6	11179076							background	13270	0.064	0.051	0.166	854.795	2918222
e4	Margin	250076	0.237	0.025	0.888	59364.3	37569645		8848.99				e4	Margin	250076	0.099	0.019	0.561	24767.3	50821332		1010.1
	background	164383	0.202	0.117	0.377	33205.4	26569593							background	38941	0.095	0.052	0.561	3702.61	7982804
e5	Margin	128466	0.087	0.014	0.574	11175.8	26851638		1155.46				e5	Margin	128466	0.068	0.014	0.411	8751.31	28022552		3484.21
	background	2982	0.097	0.078	0.119	288.194	608788							background	3670	0.06	0.041	0.101	221.709	814453
e7	Margin	153539	0.128	0.021	0.992	19632.2	29252972		4431.81				e7	Margin	153539	0.057	0.007	0.225	8796.67	34332725		2040.96
	background	2987	0.099	0.066	0.139	296.935	606054							background	4929	0.044	0.025	0.093	216.623	1136017
e9	Margin	186097	0.163	0.032	0.6	30252.5	32898884		5687.71				e9	Margin	186097	0.075	0.021	0.531	13976.4	39948565		949.627
	background	15207	0.132	0.06	0.181	2007.32	2996417							background	29342	0.07	0.041	0.139	2053.88	6369442
e12	Margin	115178	0.058	0.01	0.621	6701.48	25790069		4513.1				e12	Margin	115178	0.073	0.016	0.415	8425.92	24843462		363.463
	background	15787	0.036	0.019	0.11	564.4	3707886							background	20923	0.07	0.047	0.164	1465.74	4541743
e13	Margin	210094	0.136	0.014	0.763	28669.5	39328628		4298.6				e13	Margin	210094	0.076	0.016	0.561	15998.9	45004573		1922.63
	background	18929	0.116	0.076	1.293	2194.16	3704626							background	10271	0.067	0.051	0.114	692.81	2242574
e16	Margin	153971	0.049	0.005	0.174	7564.49	35084899		3253.3				e16	Margin	153971	0.031	0.01	0.176	4717.56	36592605		98.429
	background	15548	0.028	0.01	0.103	441.081	3714443							background	24066	0.03	0.023	0.08	722.524	5727280
Average									4919.48				Average									1450.16
6h Mea+DMSO	ROI												6h Mea+DMSO	ROI
e1	Margin	283479	0.101	0.034	0.574	28618.1	57315886		7073.68				e1	Margin	283479	0.09	0.017	0.509	25580.3	58951850		11689.8
	background	38339	0.096	0.076	0.424	3687.13	7837706							background	12999	0.066	0.049	0.123	853.525	2850029
e2	Margin	281097	0.116	0.035	0.353	32519	55026981		9750.17				e2	Margin	281097	0.061	0.009	0.744	17024	62496263		8591.09
	background	44305	0.105	0.081	0.152	4665.42	8874607							background	14126	0.044	0.03	0.086	615.874	3258338
e3	Margin	249530	0.18	0.045	0.716	44904.4	42410357		11966.4				e3	Margin	249530	0.073	0.016	0.276	18128.1	53870786		8396.47
	background	39877	0.132	0.076	0.531	5254.15	7523616							background	3449	0.06	0.039	0.132	207.916	765641
e4	Margin	263262	0.077	0.017	0.658	20250.2	56285643		9456.42				e4	Margin	263262	0.046	0.007	0.514	12201	60448991		7725.57
	background	39794	0.061	0.041	0.078	2421.47	8821058							background	19788	0.021	0.017	0.025	409.724	4811048
e5	Margin	281121	0.093	0.025	0.628	26126.7	58024576		14319.6				e5	Margin	281121	0.095	0.021	0.85	26830.8	57693145		9963.57
	background	8603	0.074	0.042	0.095	634.176	1851361							background	1791	0.082	0.06	0.13	147.111	378103
e6	Margin	278159	0.127	0.03	0.682	35214.2	53089095		9345.46				e6	Margin	292941	0.104	0.012	0.85	30501.6	59245454		18491
	background	1981	0.109	0.093	0.142	216.523	392803							background	2258	0.055	0.041	0.088	124.794	507017
e7	Margin	371211	0.114	0.025	0.526	42167.5	73001436		12470.7				e7	Margin	371211	0.111	0.012	0.699	41235.2	73730556		22303.4
	background	8469	0.103	0.08	0.142	876.131	1702102							background	2062	0.075	0.051	0.151	155.666	442052
Average									10626.1				Average									12451.6
5h Mea+SB431542	ROI												5h Mea+SB431542	ROI
e1	Margin	177646	0.197	0.035	0.992	35075.3	29284123		4342.58				e1	Margin	177646	0.045	0.012	0.6	8063.84	40811283		2379.17
	background	41161	0.173	0.072	0.335	7120.85	7558975							background	2626	0.041	0.032	0.068	107.436	609453
e3	Margin	162143	0.075	0.009	1.176	12204.9	34801054		2152.07				e3	Margin	85789	0.028	0.002	0.097	2423.53	20500637		278.805
	background	4481	0.062	0.043	0.088	277.839	990850							background	4238	0.032	0.025	0.043	135.034	1004260
e6	Margin	277989	0.147	0.017	0.915	40887.7	50744470		7251.06				e6	Margin	277989	0.045	0.007	1.293	12560	63925884		3386.4
	background	28137	0.121	0.06	0.135	3404.58	5690664							background	20304	0.033	0.026	0.049	661.903	4803245
e10	Margin	190406	0.105	0.039	0.555	19912.6	38198208		4489.7				e10	Margin	190406	0.049	0.017	0.901	9243.14	43427673		1436.5
	background	4995	0.109	0.081	0.135	544.211	991261							background	6230	0.041	0.034	0.062	256.838	1444807
e11	Margin	232745	0.154	0.021	0.975	35912.2	42246119		5189.85				e11	Margin	153894	0.04	0.023	2.708	6218.93	35774047		370.955
	background	320761	0.132	0.051	0.225	42340.5	64753696							background	8778	0.038	0.026	0.07	329.487	2053165
e17	Margin	210142	0.188	0.039	0.838	39465.5	34992523		7103.68				e17	Margin	210142	0.092	0.025	0.369	19405.6	43365412		2384.1
	background	21993	0.154	0.093	0.219	3386.92	4125030							background	14817	0.081	0.06	0.135	1206.91	3132445
e19	Margin	283976	0.165	0.025	1.365	46947.5	49828710		6906.91				e19	Margin	283976	0.111	0.023	0.531	31443.1	56187846		1625.66
	background	17756	0.141	0.093	0.239	2503.6	3508588							background	29985	0.105	0.066	0.166	3155.3	6002816
Average									5347.98				Average									1694.51

## Sheet: Hwa
ndr1(Dig 549)													ndr2(Flu 488)
		Area	Mean	Min	Max	IntDen	RawIntDen		Total Intensity						Area	Mean	Min	Max	IntDen	RawIntDen		Total Intensity
3.7h Mhwa+DMSO	ROI												3.7h Mhwa+DMSO	ROI
e1	Margin	143066	0.19	0.028	0.561	27115.7	23704285		362.366				e1	Margin	143066	0.077	0.012	0.587	11050	30580954		1321.54
	background	5241	0.187	0.101	0.267	980.628	872244							background	5301	0.068	0.049	0.123	359.591	1156459
e2	Margin	177082	0.259	0.035	1.202	45950.2	25384274		3096.39				e2	Margin	177082	0.077	0.017	1.365	13558.6	37971374		2756.58
	background	23555	0.242	0.126	0.804	5689.7	3457869							background	7399	0.061	0.039	0.11	453.351	1638788
e3	Margin	206379	0.183	0.019	0.804	37845.8	34960735		3999.68				e3	Margin	206379	0.042	0.007	0.594	8606.76	47854508		4272.8
	background	17681	0.257	0.164	0.457	4545.01	2500999							background	1476	0.035	0.021	0.066	51.838	347166
e6	Margin	188735	0.22	0.035	0.498	41480.2	29299294		3355.77				e6	Margin	188735	0.079	0.01	0.888	14819.6	40259346		6704.04
	background	25277	0.202	0.078	0.335	5111.07	4069972							background	10702	0.065	0.043	0.117	699.141	2348289
e7	Margin	174712	0.465	0.037	2.407	81325.1	16867740		8470.2				e7	Margin	174712	0.075	0.012	0.929	13068	37554773		4157.66
	background	16931	0.417	0.273	0.716	7053.64	1672718							background	9211	0.07	0.051	0.137	641.686	2001018
e8	Margin	167935	0.103	0.041	0.509	17365.9	33922680		6114.29				e8	Margin	167935	0.067	0.021	1.23	11215.5	36773871		3994.34
	background	49691	0.067	0.045	0.137	3338.78	10856691							background	1808	0.056	0.043	0.103	101.683	405111
e10	Margin	182418	0.249	0.041	1.503	45493.2	26573779		6455.76				e10	Margin	182418	0.099	0.025	0.477	18088.8	37113577		5137.08
	background	30303	0.214	0.099	0.361	6474.7	4749695							background	12081	0.071	0.043	0.114	858.624	2616326
e11	Margin	159391	0.159	0.025	1.503	25267.1	28388179		4546.28				e11	Margin	159391	0.069	0.01	1.151	11026.3	34744810		4491.29
	background	27215	0.13	0.091	0.242	3542.27	5147010							background	11392	0.055	0.041	0.142	624.703	2560712
e12	Margin	188128	0.185	0.028	2.708	34794.6	32419854		5822.88				e12	Margin	188128	0.076	0.016	1.128	14275.9	40397285		4681.39
	background	17305	0.154	0.076	1.327	2148.42	3333184							background	7995	0.079	0.051	0.289	628.732	1702275
e13	Margin	144143	0.183	0.049	0.52	26332	24226662		2692.52				e13	Margin	144143	0.104	0.025	1.009	14922	29044929		2525.68
	background	31087	0.164	0.088	0.27	5088.07	5443743							background	19307	0.086	0.047	0.338	1658.77	4042383
e14	Margin	191286	0.387	0.034	2.708	74118.5	20834082		3533.94				e14	Margin	191286	0.094	0.012	0.959	17957.4	39389639		3037.06
	background	8474	0.369	0.251	0.691	3126.91	967086							background	13439	0.078	0.043	0.306	1048.74	2865427
Average									4404.55				Average									3916.32
3.7h Hwa+SB431542	ROI												3.7h Hwa+SB431542	ROI
e1	Margin	150143	0.075	0.023	0.402	11258.5	32296800		1949.65				e1	Margin	162275	0.076	0.017	0.992	12364.1	34777970		2140.8
	background	18271	0.062	0.041	0.091	1126.99	4043312							background	25141	0.063	0.045	0.205	1593.92	5542165
e2	Margin	148897	0.159	0.019	1.804	23636.7	26854069		1897.77				e2	Margin	148897	0.07	0.021	1.064	10483.2	32323366		3187.24
	background	25669	0.266	0.146	0.915	6839.48	3576497							background	16123	0.064	0.049	0.279	1030.91	3549514
e3	Margin	163082	0.152	0.017	0.915	24753.2	29604170		454.02				e3	Margin	163082	0.041	0.007	1.064	6711.97	37897284		3287.25
	background	27882	0.149	0.045	0.335	4152.65	5085855							background	1607	0.028	0.021	0.056	45.429	383981
e4	Margin	159687	0.287	0.023	2.407	45823.6	21488293		1111.2				e4	Margin	159687	0.071	0.012	1.23	11374.8	34628841		1314.56
	background	3350	0.28	0.179	0.415	938.069	450880							background	2184	0.063	0.039	0.156	137.736	481755
e5	Margin	156290	0.156	0.016	1.128	24425.8	27997589		2701.45				e5	Margin	156290	0.045	0.007	0.804	7068.65	35931794		2379.95
	background	4126	0.139	0.097	0.2	571.67	765469							background	5861	0.041	0.03	0.08	242.897	1358642
e6	Margin	238227	0.153	0.025	1.407	36563.4	43319748		12264.2	6687.72			e6	Margin	238227	0.065	0.016	1.151	15536	52394127		7912.73
	background	33334	0.102	0.052	0.26	3410.26	6724537							background	1497	0.045	0.032	0.072	67.056	344386
e7	Margin	183136	0.27	0.026	0.708	49417.4	25335383		4732.24				e7	Margin	183136	0.062	0.01	1.084	11353.2	40519336		4210.87
	background	17317	0.244	0.186	0.398	4219.85	2522962							background	692	0.052	0.039	0.064	36.242	156421
e8	Margin	162482	0.248	0.039	1.009	40318.4	23732038		6522.15				e8	Margin	162482	0.038	0.007	0.498	6172.37	37995624		4060.11
	background	7684	0.208	0.135	0.331	1595.57	1218455							background	2817	0.039	0.013	0.338	108.455	657776
e9	Margin	193372	0.104	0.016	0.992	20022.1	39031003		5325.82				e9	Margin	193372	0.048	0.01	1.176	9268.67	44237371		5981.35
	background	14255	0.076	0.035	0.181	1081.05	3055285							background	7395	0.035	0.017	0.076	257.629	1740443
Average									4106.5				Average									3830.54
4h Mhwa+DMSO	ROI												4h Mhwa+DMSO	ROI
e1	Margin	199127	0.529	0.052	2.106	105399	16183138		3246.79				e1	Margin	199127	0.058	0.01	1.293	11610.7	44465757		5636.87
	background	20568	0.513	0.166	0.901	10557.9	1648940							background	2566	0.045	0.03	0.121	116.403	589552
e2	Margin	156820	0.33	0.026	1.407	51780.6	19319134		4420.97				e2	Margin	156820	0.024	0.005	0.342	3700.72	37884637		2916.62
	background	40411	0.302	0.137	0.447	12212.8	5166214							background	3494	0.023	0.005	0.119	79.503	845686
e3	Margin	160817	0.2	0.023	1.561	32187.9	26500869		10477.6				e3	Margin	160817	0.084	0.019	1.26	13501.1	33865008		4816.96
	background	35357	0.135	0.078	0.279	4787.42	6625021							background	5607	0.081	0.054	0.377	454.353	1187962
e5	Margin	268391	0.242	0.032	0.763	65012.6	39641151		5161.36				e5	Margin	268391	0.047	0.012	1.293	12730.6	61420744		5752.42
	background	21868	0.223	0.095	0.335	4873.49	3346535							background	1757	0.038	0.026	0.112	66.528	410675
e7	Margin	169416	0.312	0.039	0.744	52783.8	21463379		6194.38				e7	Margin	169416	0.06	0.016	0.773	10097.3	37726746		4167.73
	background	9223	0.275	0.189	0.377	2538.23	1249455							background	8078	0.043	0.035	0.058	348.039	1865368
e8	Margin	154007	0.328	0.064	2.106	50458.8	19290314		10879				e8	Margin	154007	0.053	0.017	0.651	8127.13	34809492		3968.94
	background	20157	0.257	0.156	0.783	5185.1	2849599							background	5926	0.045	0.027	0.064	269.417	1360975
e9	Margin	205498	0.42	0.043	1.804	86364.8	21217018		7864.54				e9	Margin	205498	0.068	0.014	1.064	14064.4	44809612		6050
	background	24968	0.382	0.213	0.443	8289.41	2973874							background	3748	0.061	0.039	0.128	229.197	830526
e10	Margin	221359	0.273	0.047	1.045	60494	30489357		6925.16				e10	Margin	221359	0.097	0.023	1.045	21525.6	45230386		4259.61
	background	70174	0.242	0.106	0.361	16975.7	10286220							background	8450	0.092	0.078	0.205	780.789	1742586
e12	Margin	250422	0.288	0.041	1.804	72081.9	33260732		6220.9				e12	Margin	250422	0.085	0.019	1.452	21326.6	52601793		3797.07
	background	2679	0.263	0.213	0.273	629.616	397731							background	2135	0.094	0.07	0.151	200.094	438880
e13	Margin	144306	0.32	0.021	0.794	46168.7	19023324		10092.2				e13	Margin	144306	0.057	0.009	1.407	8172.94	32353981		3555.15
	background	5192	0.25	0.171	0.438	1299.49	746154							background	9640	0.055	0.032	0.267	527.3	2168292
e14	Margin	189102	0.246	0.039	1.804	46474	28689944		9031.84				e14	Margin	189102	0.074	0.017	1.045	14030.4	40720821		7033.63
ruo	background	8028	0.198	0.128	0.299	1588.86	1300614						ruo	background	2056	0.059	0.037	0.26	120.414	458446
Average									7319.53				Average									4723.18
4h Hwa+SB431542	ROI												4h Hwa+SB431542	ROI
e1	Margin	202610	0.264	0.039	1.176	53527.3	28949668		3482.62				e1	Margin	202610	0.056	0.012	0.944	11324.8	45508445		5246.46
	background	58513	0.247	0.091	0.42	14468.9	8519526							background	754	0.038	0.03	0.064	28.432	176287
e2	Margin	157963	0.174	0.025	1.151	27553.4	27340202		7334.09				e2	Margin	157963	0.048	0.012	0.498	7536.33	36133350		4219.11
	background	17588	0.128	0.066	0.283	2249.26	3348376							background	8206	0.032	0.021	0.119	260.067	1945531
e4	Margin	220371	0.087	0.007	0.555	19115.2	46116279		2807.77				e4	Margin	220371	0.066	0.005	1.151	14654.2	48305308		7602.36
	background	22808	0.074	0.047	0.202	1687.58	4907078							background	2829	0.051	0.032	0.184	145.069	641221
e5	Margin	193424	0.113	0.012	1.407	21918.8	38120402		1802.67				e5	Margin	193424	0.057	0.009	1.365	11100.4	43313368		6845.06
	background	9942	0.104	0.052	0.149	1031.74	1997735							background	7231	0.052	0.022	0.093	377.291	1635320
e6	Margin	174732	0.183	0.019	1.327	32021	29512927		4588.12				e6	Margin	174732	0.068	0.012	0.503	11874.7	38132596		4011.78
	background	12715	0.157	0.103	0.242	1991.77	2262922							background	9019	0.058	0.045	0.101	522.235	2012946
e7	Margin	186045	0.106	0.021	2.708	19681.8	37317722		4240.11				e7	Margin	186045	0.054	0.01	1.365	10119.8	41956292		5282.61
	background	24403	0.083	0.052	0.239	2021.56	5143659							background	4832	0.041	0.026	0.128	199.899	1120332
e8	Margin	119579	0.051	0.005	1.293	6131.01	27133561		3021.96				e8	Margin	119579	0.03	0.005	0.411	3592.48	28466392		1081.32
	background	16578	0.049	0.026	0.184	810.839	3779234							background	8465	0.024	0.021	0.045	207.147	2040326
e9	Margin	166744	0.126	0.016	1.804	21039.4	31929700		10034.3				e9	Margin	166744	0.061	0.01	0.975	10140.3	37025306		5471.49
	background	12867	0.122	0.066	0.194	1568.99	2481295							background	5963	0.044	0.028	0.13	264.089	1373420
e10	Margin	160120	0.06	0.009	0.636	9577.54	35620063		5574.54				e10	Margin	160120	0.06	0.01	0.915	9645.2	35586136		6602.92
	background	41901	0.05	0.025	0.119	2086.49	9530246							background	8429	0.059	0.019	0.313	496.916	1878265
e11	Margin	181811	0.11	0.032	0.773	20010	36054421		4010.61				e11	Margin	181811	0.048	0.01	1.708	8798.85	41530439		3344.52
	background	16050	0.109	0.088	0.228	1750.08	3184707							background	4236	0.041	0.03	0.101	173.547	983006
Average									4689.68				Average									5534.56
4.3h Mhwa+DMSO	ROI												4.3h Mhwa+DMSO	ROI
e1	Margin	215220	0.166	0.043	0.804	35635	37675560		9378.18				e1	Margin	215220	0.076	0.019	0.531	16409	46080461		7154.57
	background	5694	0.122	0.093	0.156	691.867	1097773							background	7352	0.062	0.043	0.106	456.196	1625334
e2	Margin	258781	0.325	0.043	1.452	84199.6	31730828		8376.78				e2	Margin	258781	0.155	0.03	1.561	39983.8	46456981		9965.21
	background	9223	0.293	0.181	0.39	2700.63	1200864							background	5411	0.116	0.058	0.186	627.537	1057311
e3	Margin	183132	0.272	0.035	0.815	49840.5	25516766		9734.59				e3	Margin	189539	0.125	0.021	1.084	23650.9	36532152		7160.99
	background	27601	0.219	0.144	0.289	6056.55	4256221							background	7798	0.087	0.064	0.121	675.832	1629084
e5	Margin	289293	0.343	0.039	1.628	99293.7	34718055		9612.85				e5	Margin	289293	0.207	0.032	1.365	60004.9	46081302		12560.8
	background	6033	0.396	0.31	0.621	2388.22	620930							background	9403	0.208	0.164	0.342	1952.03	1489400
e7	Margin	292749	0.329	0.082	1.202	96441.8	35540239		13301.1				e7	Margin	292749	0.09	0.021	0.827	26484.9	60758739		13311.2
	background	31967	0.284	0.181	0.514	9071.44	4250817							background	10404	0.066	0.045	0.097	685.316	2280056
e8	Margin	283392	0.351	0.047	1.293	99374.9	33031923		15490.9				e8	Margin	283392	0.147	0.023	0.52	41667.7	51728219		13045.1
	background	3508	0.296	0.236	0.342	1036.62	453294							background	6273	0.143	0.101	0.211	894.396	1153951
Average									10982.4				Average									10533
4.3h Hwa+SB431542	ROI												4.3h Hwa+SB431542	ROI
e1	Margin	198255	0.116	0.034	0.369	23014.1	38738300		5964.13				e1	Margin	198255	0.143	0.023	1.561	28412.4	36597091		10371.2
	background	8577	0.119	0.086	0.197	1018.02	1664612							background	2604	0.123	0.091	0.222	321.504	500009
e2	Margin	238461	0.319	0.072	2.708	76050.7	31414340		6420.11				e2	Margin	238461	0.1425	0.0225	1.354	33992.6	1.67743e+07		8715.71
	background	15052	0.292	0.132	2.708	4395.18	1899538							background	8251	0.172	0.106	2.708	1420.06	1425750
e4	Margin	258780	0.171	0.045	1.064	44377.9	44633750		5819.66				e4	Margin	258780	0.064	0.016	1.327	16591.1	57033771		9345.31
	background	6794	0.149	0.112	0.216	1014	1229266							background	9138	0.049	0.028	0.181	446.087	2083547
e5 ndr1/2 not detected													e5 ndr1/2 not detected
e6	Margin	112015	0.107	0.035	0.407	11955.4	22383172		5458.56				e6	Margin	112015	0.107	0.028	0.643	11946.9	22407559		6906.19
	background	1546	0.073	0.058	0.099	112.228	333573							background	3174	0.065	0.045	0.088	206.911	696627
e7	Margin	170607	0.04	0.01	0.614	6904.9	39647005		4857.61				e7	Margin	170607	0.077	0.014	0.52	13094.2	36542405		7123
	background	8075	0.041	0.012	0.093	327.374	1875672							background	11784	0.05	0.035	0.078	589.244	2678349
e8	Margin	274965	0.251	0.052	2.708	69100.3	40690223		7783.08				e8	Margin	274965	0.1775	0.0175	1.354	48767.9	1.79055e+07		11097.7
	background	93946	0.223	0.058	2.708	20950	16252569							background	12050	0.137	0.0985	0.2465	1048.07	1.03272e+06
e10	Margin	182447	0.074	0.017	0.335	13514.2	39262725		4939.18				e10	Margin	182447	0.154	0.032	0.794	28124.3	32778585		12798.7
	background	2613	0.062	0.047	0.132	161.974	577803							background	3724	0.152	0.084	0.225	566.971	669161
e11	Margin	177171	0.154	0.019	2.407	27291.2	31853021		5144.85				e11	Margin	177171	0.196	0.016	1.354	34743	9849208		9761.85
	background	4107	0.125	0.066	0.176	514.993	785129							background	16655	0.273	0.141	0.58	4541.82	2275095
Average									5798.4				Average									9514.96
4.7h Mhwa+DMSO	ROI												4.7h Mhwa+DMSO	ROI
e3	Margin	357031	0.204	0.032	0.929	72725.5	57471944		19170.9				e3	Margin	357031	0.127	0.03	1.365	45332.3	68137785		17483.9
	background	18239	0.15	0.088	0.331	2735.85	3451930							background	21722	0.132	0.078	0.944	2859.85	4100997
e4	Margin	326427	0.211	0.039	0.85	68727.8	51755803		19437.3				e4	Margin	326427	0.115	0.028	0.929	37593.1	64055221		10499.7
	background	5175	0.151	0.114	0.184	781.425	976698							background	3573	0.083	0.054	0.216	295.901	753333
e5	Margin	328140	0.181	0.032	0.716	59329.4	55474584		15686.8				e5	Margin	328140	0.095	0.021	0.992	31335.6	67301764		12303.5
	background	2169	0.133	0.084	0.181	288.477	416863							background	3820	0.08	0.058	0.112	306.723	809769
e6	Margin	228787	0.08	0.014	1.064	18287.4	48659788		8907.17				e6	Margin	228787	0.147	0.028	0.783	33593.4	41865285	5681.39
	background	16253	0.069	0.041	0.144	1118.56	3538147							background	17990	0.122	0.06	0.211	2188.83	3472953
e7	Margin	368768	0.071	0.009	0.26	26179.8	79936493		11060.3				e7	Margin	368768	0.095	0.019	0.827	35065.6	75699941		13677.1
	background	9837	0.05	0.041	0.08	493.506	2234885							background	1748	0.058	0.041	0.084	101.378	390067
e8	Margin	314803	0.109	0.014	1.327	34204.8	62840473		6502.17				e8	Margin	314803	0.139	0.03	0.621	43665	58476417		11869.9
	background	20186	0.15	0.088	0.915	3029.24	3659327							background	201	0.101	0.076	0.126	20.312	40626
e9	Margin	269938	0.106	0.016	0.398	28696.2	54031026		6561.33				e9	Margin	269938	0.1	0.017	0.708	26968.3	54840362		11851.8
	background	10006	0.098	0.082	0.146	978.773	2037242							background	5876	0.077	0.056	0.186	454.28	1254467
Average									12475.1				Average									12947.6
4.7h MHwa+SB431542	ROI												4.7h MHwa+SB431542	ROI
e1	Margin	307792	0.097	0.017	1.452	29814.9	62944871		9192.85				e1	Margin	307792	0.137	0.019	1.929	42063.5	57768996		21749.2
	background	2475	0.067	0.049	0.108	165.825	535128							background	1688	0.113	0.066	0.179	190.99	331938
e2	Margin	204549	0.149	0.019	1.106	30493.4	37356556		6970.27				e2	Margin	204549	0.091	0.026	1.106	18669.5	42334366		8032.97
	background	2686	0.115	0.084	0.149	308.378	526030							background	631	0.076	0.052	0.106	47.818	135159
e3	Margin	235005	0.125	0.009	1.23	29292.7	45216294		6262.22				e3	Margin	235005	0.157	0.016	1.045	36910.4	42031577		18345
	background	4648	0.098	0.052	0.168	457.096	945665							background	8019	0.204	0.079	0.433	1636.65	1282351
e4	Margin	242922	0.161	0.054	1.929	38991.7	43137871		6440.16				e4	Margin	242922	0.113	0.028	1.452	27550.9	47816418		12975.6
	background	4649	0.134	0.093	0.216	621.75	872602							background	3323	0.113	0.06	0.267	375.841	654390
e5	Margin	221811	0.06	0.012	1.365	13263.7	49332861		7052.95				e5	Margin	221811	0.095	0.014	1.407	21073.3	45575147		9539.18
	background	29877	0.042	0.028	0.126	1264.09	6912418							background	4865	0.095	0.052	0.373	461.783	999166
e6	Margin	277687	0.078	0.03	1.929	21797.7	59195994		5414.19				e6	Margin	277687	0.101	0.025	1.407	27968.9	56408080		19082.9
	background	29139	0.059	0.047	0.11	1720.37	6487681							background	702	0.049	0.032	0.064	34.164	160075
e7 ndr1 not detected													e7	Margin	221811	0.095	0.014	1.407	21073.3	45575147		11757.3
														background	4865	0.095	0.042	0.373	461.783	999166
e8 ndr1 not detected													e8	Margin	277687	0.101	0.025	1.407	27968.9	56408080		21859.8
														background	702	0.049	0.022	0.072	34.164	160075
Average									6888.77				Average									14954.2
5h Mhwa+DMSO	ROI												5h Mhwa+DMSO	ROI
e1	Margin	301919	0.343	0.041	1.561	103691	36386186		4360.03				e1	Margin	301919	0.072	0.01	0.594	21731.7	65369263		9956.87
	background	9500	0.329	0.254	0.415	3126.81	1137795							background	19700	0.056	0.039	0.121	1097.53	4419227
e2	Margin	243780	0.195	0.026	0.658	47592.7	40013683		11025.7				e2	Margin	243780	0.112	0.014	0.462	27392.9	48064406		1552.26
	background	38551	0.15	0.074	0.607	5768.48	7006499							background	5794	0.126	0.106	0.179	729.521	1105871
e3	Margin	184593	0.291	0.052	1.503	53790.5	25233801		7088.42				e3	Margin	184593	0.106	0.019	1.327	19519	37028571		8443.43
	background	22041	0.253	0.091	0.699	5565.93	3166869							background	31043	0.088	0.06	0.283	2739.95	6466964
e4	Margin	286973	0.185	0.017	0.614	53012.1	49279933		3652.78				e4	Margin	286973	0.187	0.023	1.26	53752.4	47877103		19602.6
	background	77553	0.172	0.06	0.537	13344.8	13430238							background	9244	0.168	0.119	0.264	1550.64	1603141
e5	Margin	250695	0.314	0.016	1.804	78620.7	33871545		18955.3				e5	Margin	250695	0.111	0.012	0.944	27723.1	49708887		6163.33
	background	30195	0.238	0.126	0.773	7176.83	4513995							background	11583	0.106	0.086	0.137	1222.47	2316829
e6	Margin	334917	0.503	0.052	1.452	168309	28013853		8888.49				e6	Margin	334917	0.212	0.028	0.658	71034	52739670		9409.28
	background	67634	0.476	0.296	1.064	32166.3	5921896							background	12862	0.184	0.106	0.342	2362.55	2152092
e7	Margin	229280	0.151	0.023	0.929	34655.7	41616283		6454.24				e7	Margin	229280	0.157	0.023	1.26	36097.9	40863960		5145.07
	background	33136	0.123	0.07	0.313	4083.98	6375803							background	7908	0.135	0.093	0.213	1070.09	1477369
e8	Margin	269291	0.438	0.043	2.106	118033	27358931		14086.6				e8	Margin	269291	0.084	0.014	0.509	22718.4	56625101		10061.7
	background	12462	0.491	0.386	0.663	6114.27	1035738							background	45144	0.07	0.047	0.11	3162.5	9798784
e9	Margin	286024	0.311	0.051	2.407	88840.3	37529088		16762.3				e9	Margin	286024	0.193	0.023	0.753	55204.3	47123444		14874.9
	background	82417	0.252	0.101	0.594	20753.6	12067435							background	893	0.141	0.103	0.181	125.609	164799
e10	Margin	255804	0.166	0.026	0.666	42336	45004285		7546.65				e10	Margin	255804	0.189	0.035	2.708	48366.2	42892671		14600.1
	background	47255	0.136	0.099	0.411	6414.25	8823924							background	9876	0.2	0.132	0.394	1977.96	1592112
e11	Margin	201701	0.311	0.051	2.106	62820.9	26357111		10983.8				e11	Margin	201701	0.111	0.017	0.944	22319.9	40000066		8200.84
	background	38517	0.257	0.168	0.526	9904.36	5482531							background	5679	0.093	0.07	0.146	529.087	1168866
Average									9982.21				Average									10645.8
5h MHwa+SB431542	ROI												5h MHwa+SB431542	ROI
e1	Margin	218683	0.105	0.014	1.045	22953.1	44097865		4146.38				e1	Margin	218683	0.091	0.016	0.975	19795.2	45401554		6674.25
	background	57480	0.086	0.037	0.251	4926.94	12057770							background	36266	0.06	0.034	0.139	2164.03	8062737
e2	Margin	359815	0.148	0.034	1.202	53112	65610306		9214.58				e2	Margin	359815	0.104	0.023	1.407	37269.1	72527068		18918.5
	background	15147	0.122	0.072	0.251	1849.01	2919617							background	923	0.072	0.051	0.13	66.21	199573
e3	Margin	227095	0.125	0.045	1.064	28293.8	43577029		6719.74				e3	Margin	227095	0.102	0.016	0.658	23137.3	46108903		14734.7
	background	23633	0.095	0.078	0.211	2250.76	4840405							background	13027	0.061	0.037	0.112	793.825	2887602
e4	Margin	225987	0.063	0.012	0.493	14235.1	49889371		2257.75				e4	Margin	225987	0.124	0.023	0.561	27945.2	43573387		11222.1
	background	5827	0.053	0.039	0.08	306.683	1316441							background	11556	0.104	0.074	0.242	1204.69	2319010
e5	Margin	153184	0.127	0.028	1.628	19522.3	29242913		6961.18				e5	Margin	153184	0.061	0.017	1.327	9320.02	33972390		4111.77
	background	10691	0.123	0.082	0.342	1318.89	2053724							background	8807	0.05	0.034	0.103	442.217	2000827
e6	Margin	227108	0.103	0.021	0.433	23335	45788948		1305.52				e6	Margin	227108	0.079	0.012	0.561	17906.3	48479946		11547.3
	background	8359	0.097	0.074	0.168	809.378	1705921							background	8034	0.051	0.028	0.097	406.981	1823241
e8	Margin	181005	0.162	0.023	1.064	29374	31997184		2947.26				e8	Margin	181005	0.114	0.023	0.651	20709.5	35535619		5867.09
	background	15066	0.146	0.078	0.299	2199.06	2747803							background	3893	0.11	0.082	0.168	427.381	771216
e9	Margin	244850	0.094	0.03	0.862	23106.3	50328837		4497.68				e9	Margin	244850	0.113	0.028	1.106	27625.2	48356473		12934.2
	background	19404	0.076	0.056	0.146	1466.96	4158152							background	1677	0.096	0.06	0.151	160.377	343320
e10	Margin	242214	0.091	0.028	0.279	22042.5	50192567		1212.06				e10	Margin	242214	0.1	0.023	0.537	24144.7	49256700		9611.9
	background	14500	0.086	0.066	0.159	1250.85	3032013							background	15018	0.072	0.06	0.128	1085.77	3242572
e13	Margin	193342	0.15	0.026	2.407	28954.4	35146321		1886.54				e13	Margin	193342	0.087	0.023	0.373	16730.5	40445694		6676.76
	background	16580	0.14	0.078	0.257	2315.32	3072384							background	4829	0.075	0.052	0.132	361.385	1036688
e11	Margin	191482	0.074	0.017	0.493	14206.2	41207716		1568.42				e11	Margin	191482	0.087	0.016	0.509	16590	40107515		6632.92
	background	6714	0.066	0.051	0.112	444.518	1470177							background	6139	0.063	0.052	0.088	388.846	1353070
e7	Margin	178324	0.084	0.019	0.708	14925.2	37544194		2799.21				e7	Margin	178324	0.056	0.016	0.39	9975.73	39996239		1594.5
	background	6346	0.068	0.051	0.101	432.285	1383463							background	4593	0.059	0.047	0.101	270.409	1022860
Average									3793.03				Average									9902.87
6h Mhwa+DMSO	ROI												6h Mhwa+DMSO	ROI
e4	Margin	361034	0.197	0.035	1.804	71110.4	58916982		3236.04				e4	Margin	361034	0.165	0.025	0.804	59749.2	63198449		12814.8
	background	30441	0.188	0.132	0.346	5732.47	5036563							background	20207	0.177	0.13	0.424	3578.62	3433032
e5	Margin	355908	0.046	0.009	1.708	16265.5	81746088		2741.04				e5	Margin	355908	0.095	0.016	1.23	33924.4	73058729		12569.9
	background	23822	0.038	0.028	0.142	914.07	5561510							background	7324	0.091	0.06	0.35	663.5	1517167
e6	Margin	302931	0.099	0.016	0.959	29966.4	61640602		3308.52				e6	Margin	302931	0.071	0.012	0.251	21423.2	65710392		3247.29
	background	10382	0.088	0.06	0.174	918.324	2160331							background	6384	0.06	0.043	0.108	381.488	1418881
e7	Margin	242953	0.054	0.009	0.587	13188.5	54699956		4199.25				e7	Margin	242953	0.076	0.014	0.447	18490.4	52066640		5128.01
	background	59590	0.06	0.037	0.27	3555.13	13248680							background	5226	0.055	0.041	0.101	286.713	1174634
e11	Margin	338189	0.042	0.009	0.385	14315.3	78267920		3493.23				e11	Margin	338189	0.094	0.019	0.875	31687.6	69637678		8690.72
	background	50704	0.032	0.023	0.171	1638.03	12003574							background	13677	0.096	0.068	0.293	1317.77	2795883
e12	Margin	279730	0.105	0.025	0.915	29490.4	56053034		7391.73				e12	Margin	279730	0.066	0.016	0.303	18456.4	61304509		2791.53
	background	2004	0.079	0.052	0.126	159.125	425771							background	8934	0.064	0.056	0.156	575.87	1964084
e13	Margin	213514	0.104	0.019	0.888	22175.7	42944963		2532.39				e13	Margin	213514	0.049	0.012	0.2	10412.8	48679458		5501.96
	background	10408	0.092	0.074	0.144	961.237	2145921							background	12663	0.04	0.023	0.082	511.633	2942393
e8	Margin	255853	0.091	0.023	0.85	23174.2	53051092		3217.63				e8	Margin	255853	0.064	0.012	0.498	16276.8	56546447		3995.86
	background	6667	0.091	0.078	0.126	607.833	1378256							background	7366	0.048	0.028	0.078	357	1680464
Average									3764.98				Average									6842.51
6h MHwa+SB431542	ROI												6h MHwa+SB431542	ROI
e1	Margin	298181	0.036	0.009	0.699	10856	69935048		121.462				e1	Margin	298181	0.099	0.014	0.682	29629.7	60614412		7862.47
	background	42029	0.036	0.014	0.076	1530.09	9856146							background	2001	0.073	0.06	0.099	146.015	431373
e2	Margin	247966	0.062	0.014	0.26	15409.8	54842563		283.921				e2	Margin	247966	0.087	0.019	0.514	21532.9	51853568		1943.56
	background	16437	0.061	0.041	0.106	1001.15	3643636							background	16208	0.079	0.052	0.151	1286.14	3443710
e3	Margin	241679	0.18	0.049	0.944	43385.7	40970639		6167.16				e3	Margin	241679	0.095	0.023	0.342	22914	49643899		3337.98
	background	17876	0.154	0.093	0.537	2751.06	3205243							background	14969	0.081	0.056	0.197	1205.75	3172502
e4	Margin	106596	0.049	0.01	0.251	5250.35	24282665		27.147				e4	Margin	106596	0.055	0.01	0.296	5886.75	23967297		2902.06
	background	1261	0.049	0.041	0.07	62.281	287000							background	1867	0.044	0.028	0.066	81.72	430476
e5	Margin	221348	0.103	0.032	0.725	22775.3	44610241		2632.63				e5	Margin	221348	0.109	0.021	0.862	24112.3	44179386		8175.25
	background	30900	0.091	0.062	0.725	2806.03	6397587							background	9436	0.081	0.072	0.114	760.863	1998609
e6	Margin	141916	0.05	0.016	0.213	7084.64	32267924		272.672				e6	Margin	141916	0.049	0.014	0.135	6984.88	32331198		3011.23
	background	15246	0.048	0.035	0.068	737.678	3478138							background	4482	0.051	0.028	0.074	227.118	1017133
e7	Margin	137121	0.05	0.014	0.213	6917.58	31145881		1706.98				e7	Margin	146136	0.112	0.028	0.385	16406.9	28837474		4423.71
	background	6874	0.038	0.028	0.11	258.301	1607699							background	9789	0.12	0.082	0.242	1173.09	1894932
Average									1601.71				Average									4522.32
